# Supplementary material for: Effects of strawberry supplementation on cardiovascular risk factors: a comprehensive systematic review and meta-analysis of randomized controlled trials
Source: Royal Society of Chemistry journal article supplement (doi:10.1039/c9fo01684h), 2019-01-01
Supplement: c9fo01684h8.pdf [file c9fo01684h8.pdf]

**Supplemental Files:**

**Supplemental Figure 1:** Flow chart of study selection based on PRISMA guidelines.

**Supplemental Figure 2:** Forest plot presenting mean difference (MD) and 95% confidence intervals for the impact of strawberry supplementation on a) Body weight, b) Body Mass Index, c) Waist Circumference, d) Fasting Blood Sugar, e) HbA1c, f) Insulin;

**Supplemental Figure 3:** Forest plot presenting mean difference (MD) and 95% confidence intervals for the impact of strawberry supplementation on a) oxidized LDL, b) Intracellular adhesion Molecule-1, c) Vascular Cell Adhesion Molecule-1,

**Supplemental Figure 4:** Funnel plot displaying publication bias in the studies reporting the impact of strawberry supplementation on a) HbA1c, b) Body Mass Index, c) C-Reactive Protein, d) Diastolic Blood Pressure, e) Fasting Blood Sugar, f) High Density Lipoprotein, g) Intracellular adhesion Molecule-1, h) Insulin.

**Supplemental Figure 5:** Funnel plot displaying publication bias in the studies reporting the impact of strawberry supplementation on a) Low-Density Lipoprotein, b) Malondialdehyde, c) Systolic Blood Pressure, d) Total Cholesterol, e) Triglyceride f) Vascular Cell Adhesion Molecule-1 g) Waist Circumference h) Weight.

**Supplemental Table 1:** Cochrane risk of bias of included studies.

**Supplemental Table 2:** Subgroup analysis to assess the effect of strawberry supplementation on cardiovascular risk factors
