# Supplementary figures and images for: Effects of strawberry supplementation on cardiovascular risk factors: a comprehensive systematic review and meta-analysis of randomized controlled trials
Source: Royal Society of Chemistry journal article supplement (doi:10.1039/c9fo01684h), 2019-01-01

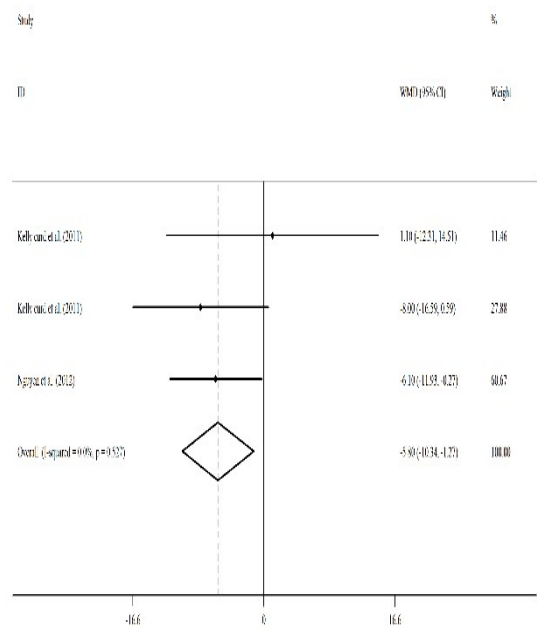

**a)**

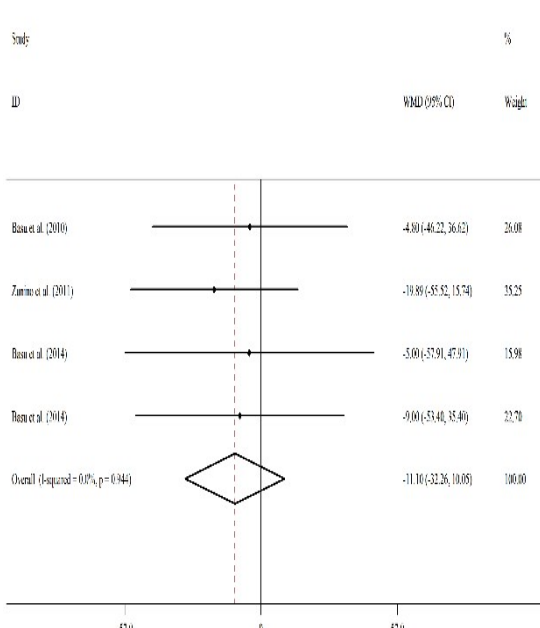

**b)**

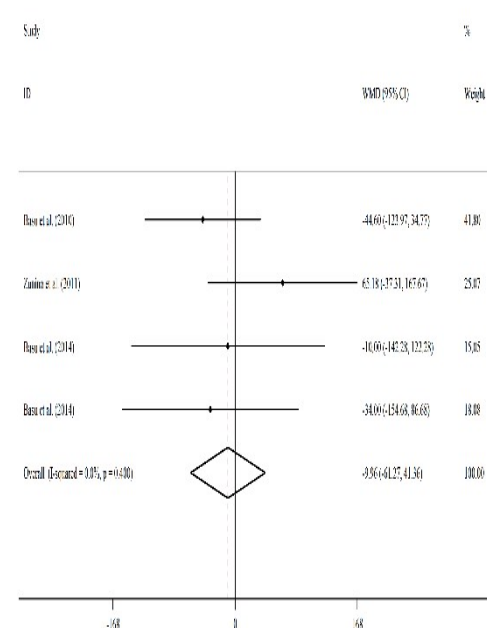

**c)**

Supplement: c9fo01684h5.pdf [file c9fo01684h5.pdf]

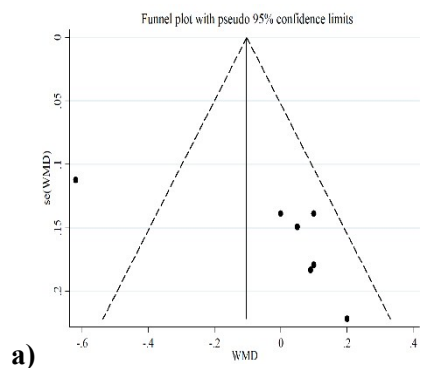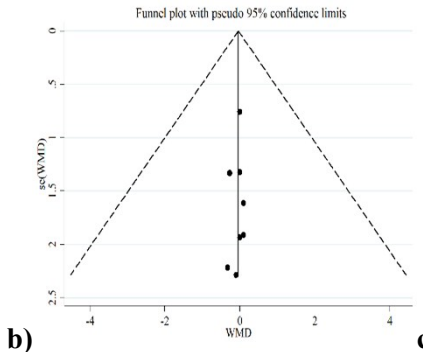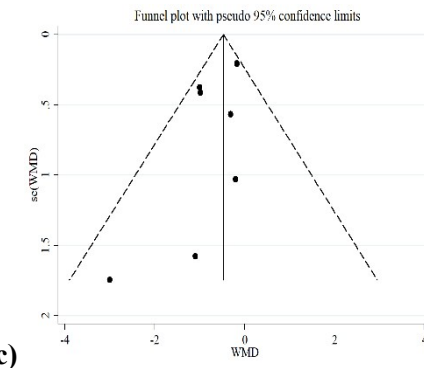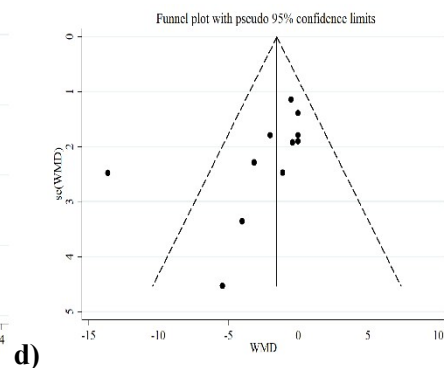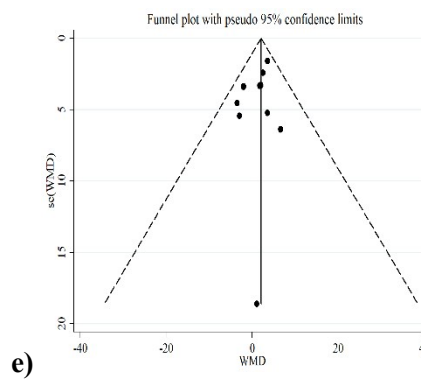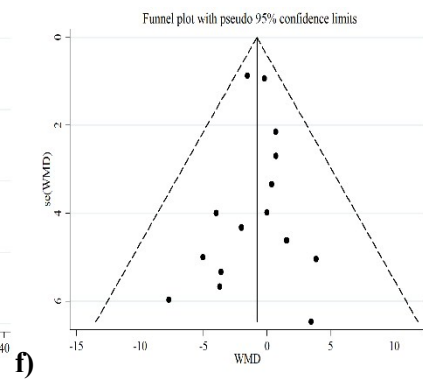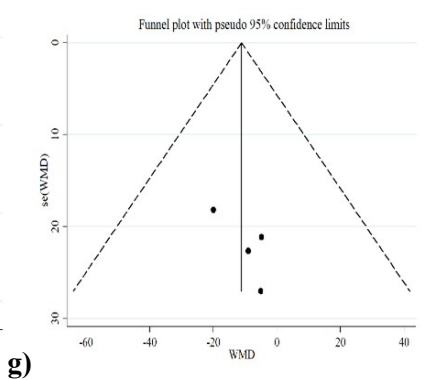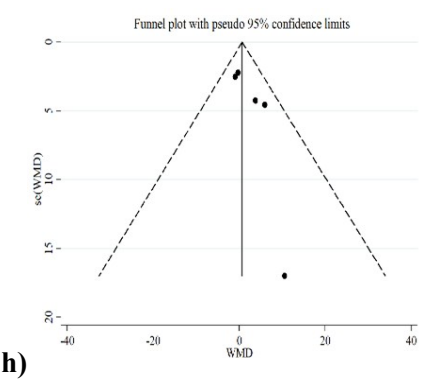

Supplement: c9fo01684h6.pdf [file c9fo01684h6.pdf]
